# Supplementary material
Source: Research Square preprint supplement (doi:10.21203/rs.3.rs-9889678/v1)
Supplement: Supplementary file 1 [file 45bb456013728f98a0f9e107.docx]

**Supplementary figure 1**


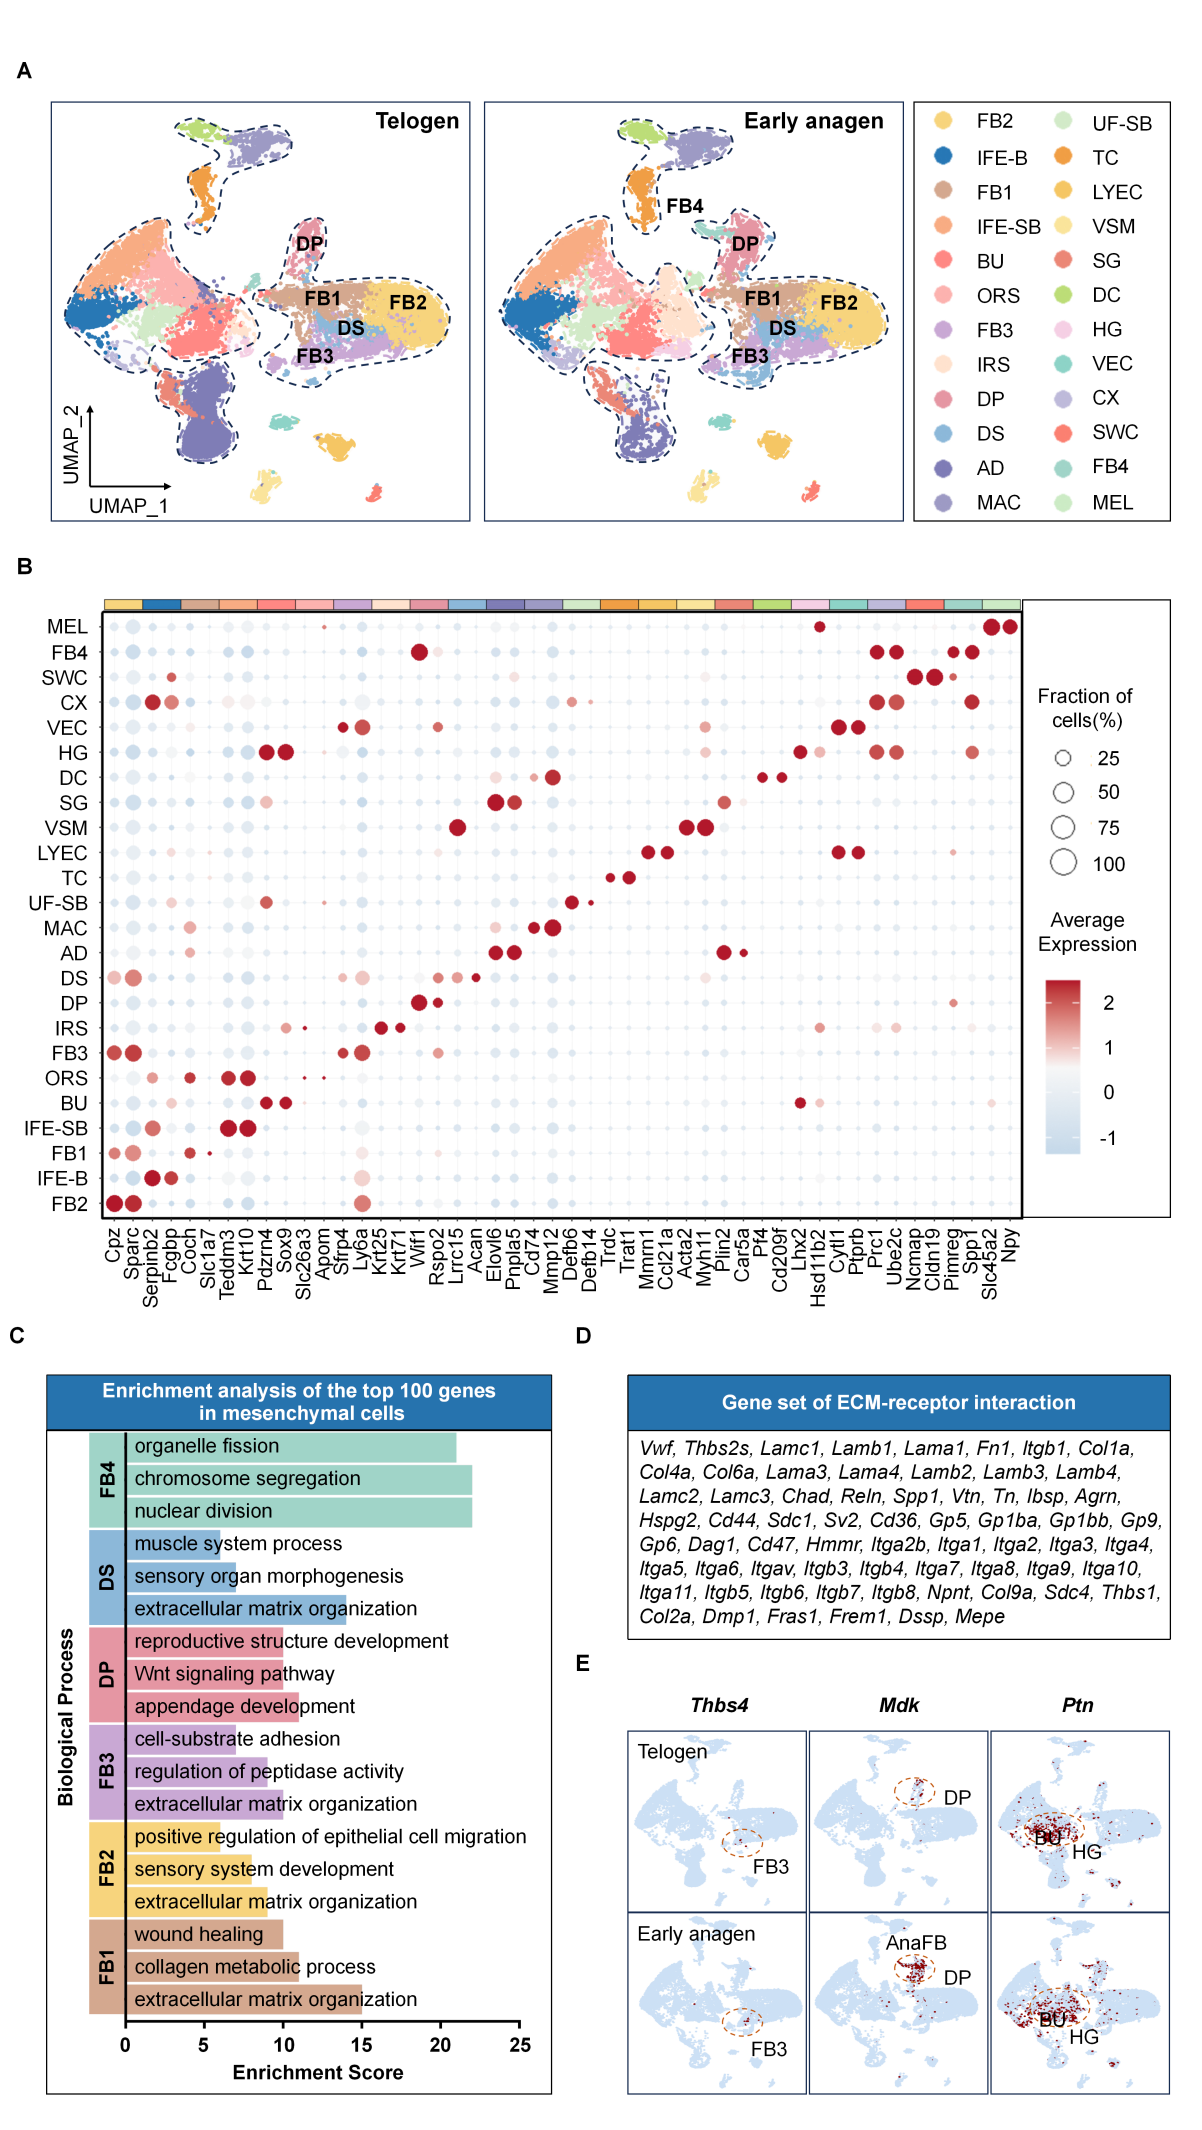


**Figure S1**

(A) UMAP of 24 skin cell clusters from telogen/early anagen skin.

(B) Heatmap showing the expression of representative marker genes across all 24 cell clusters.

(C) Enrichment analysis of top 100 genes odf mesenchymal cells.

(D) ECM-receptor interaction gene set used for pathway scoring of mesenchymal cells.

(E) FeaturePlots of Thbs4, Mdk, and Ptn showing their distinct expression patterns in skin cell clusters.

**Supplementary figure 2**

**
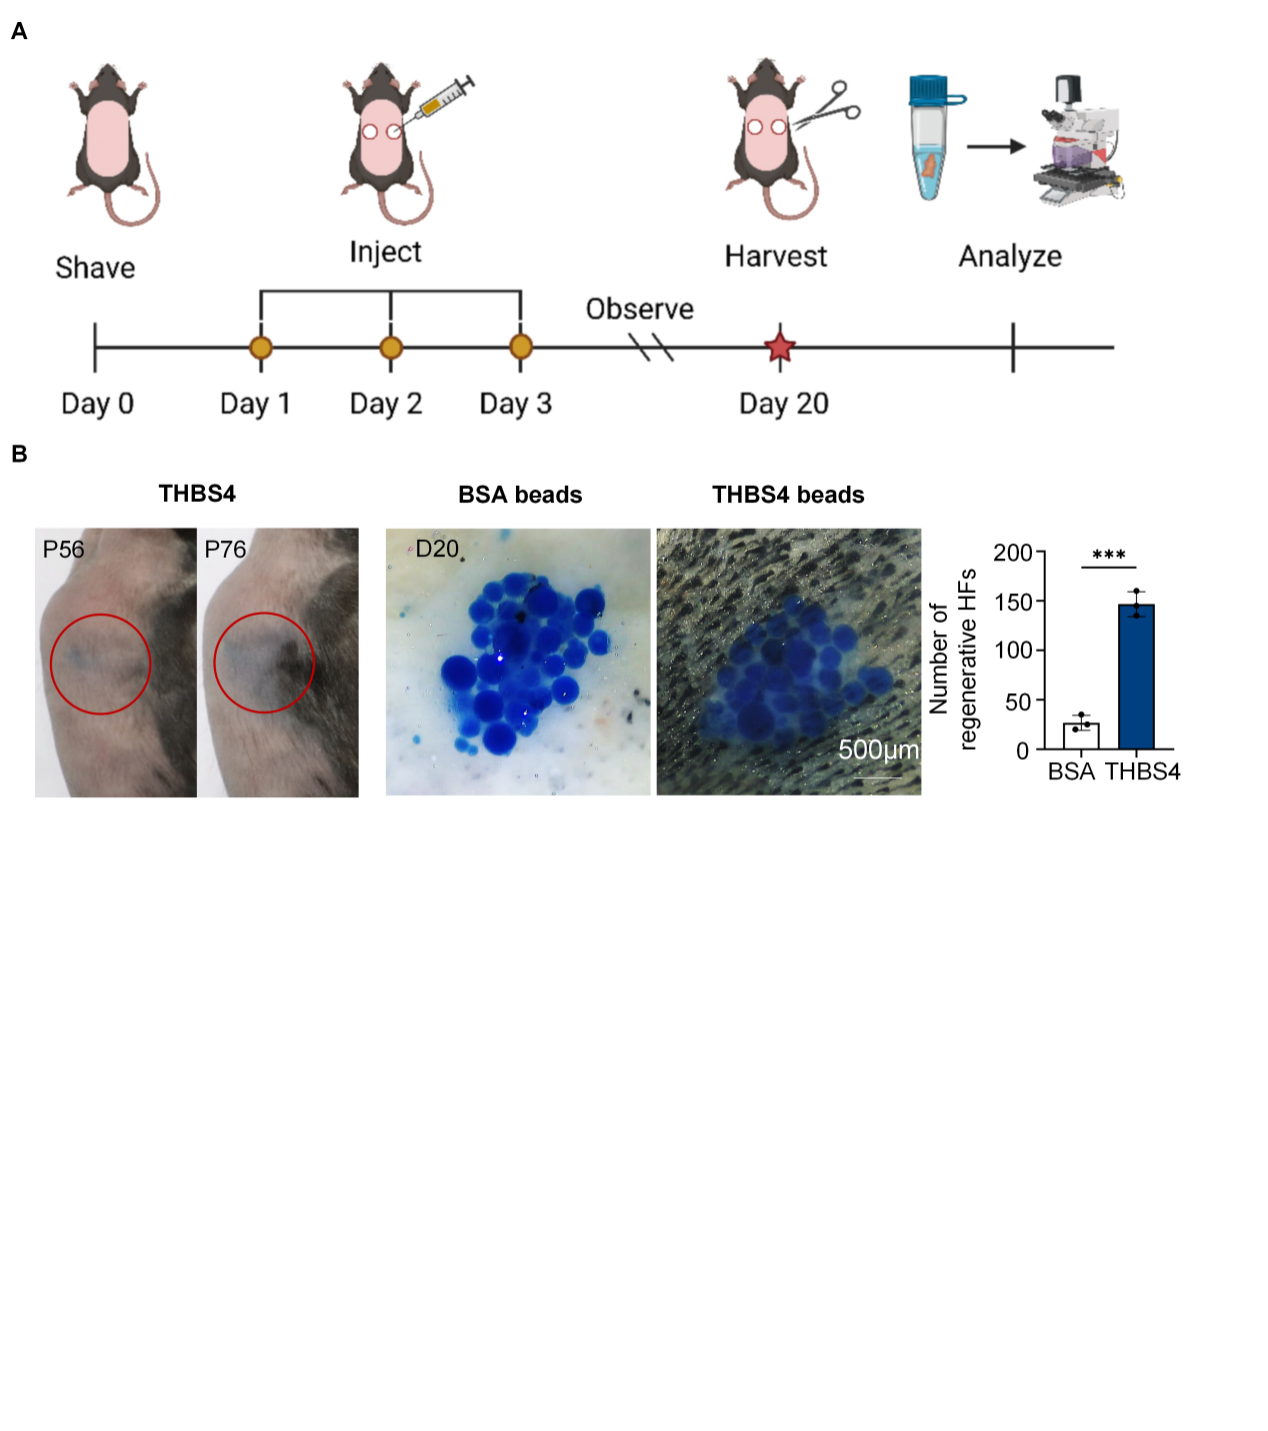
**

**Figure S2**

1. Schematic of the in vivo assay: intradermal injection of THBS4 or BSA in telogen C57 mice, analyzed at day 20.

**Supplementary figure 3**


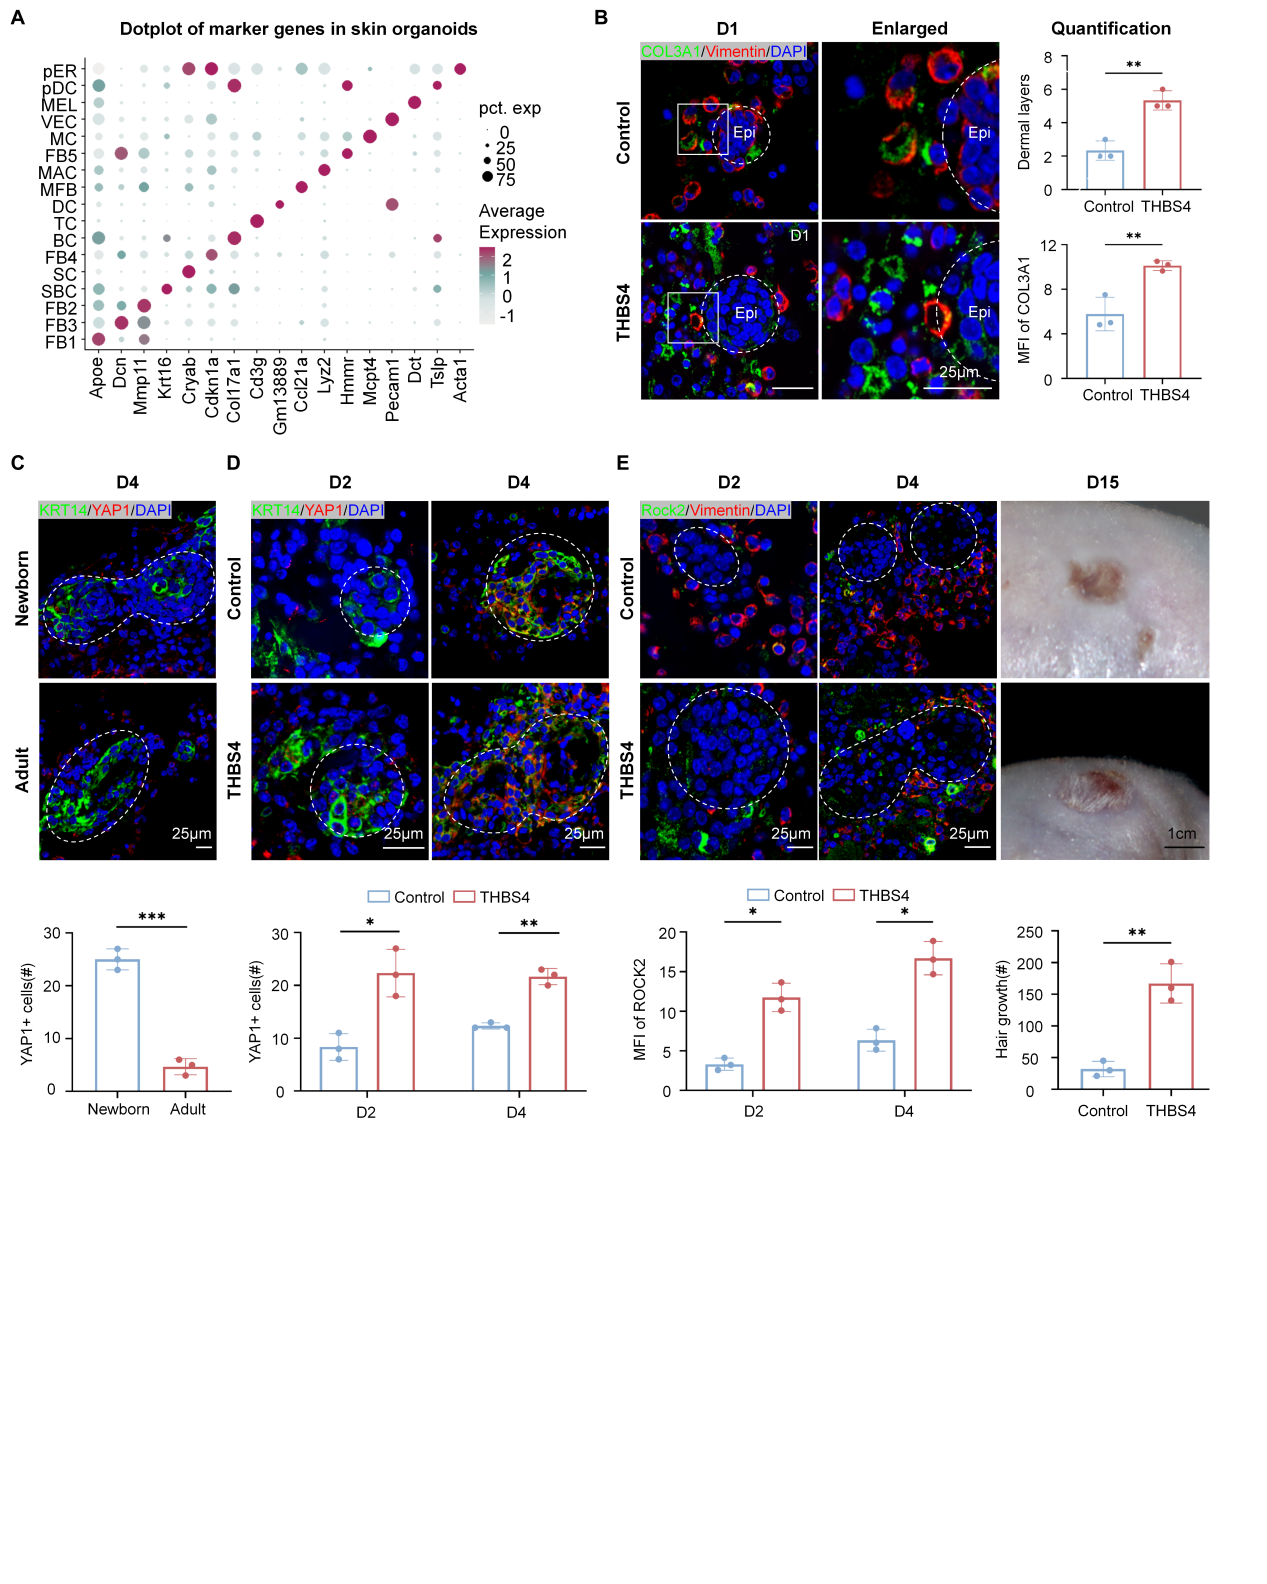


**Figure S3**

1. Marker gene dot plot confirming cell identities in newborn/adult organoids at D4.

(B) COL3A1/Vimentin/DAPI immunofluorescence in control/THBS4-treated adult organoids at D1. Scale bar=25 μm. N=3, **P<0.01.

(C) YAP1/KRT14/DAPI immunofluorescence in newborn/adult organoids at D4. Scale bar=25 μm. N=3, ***P<0.001.

(D) YAP1 immunofluorescence in control/THBS4-treated adult organoids at D2 and D4. Scale bar=25 μm. N=3, **P<0.01, and *P<0.05.

(E) Representative images of Immunofluorescence labeling of ROCK2 in control/THBS4-treated adult organoids at D2 and D4. Images of nude mouse transplantation at D15 showing earlier hair growth in THBS4 group. Scale bar=25 μm.Scale bar=1 cm. N=3, *P<0.05.

**Supplementary figure 4**


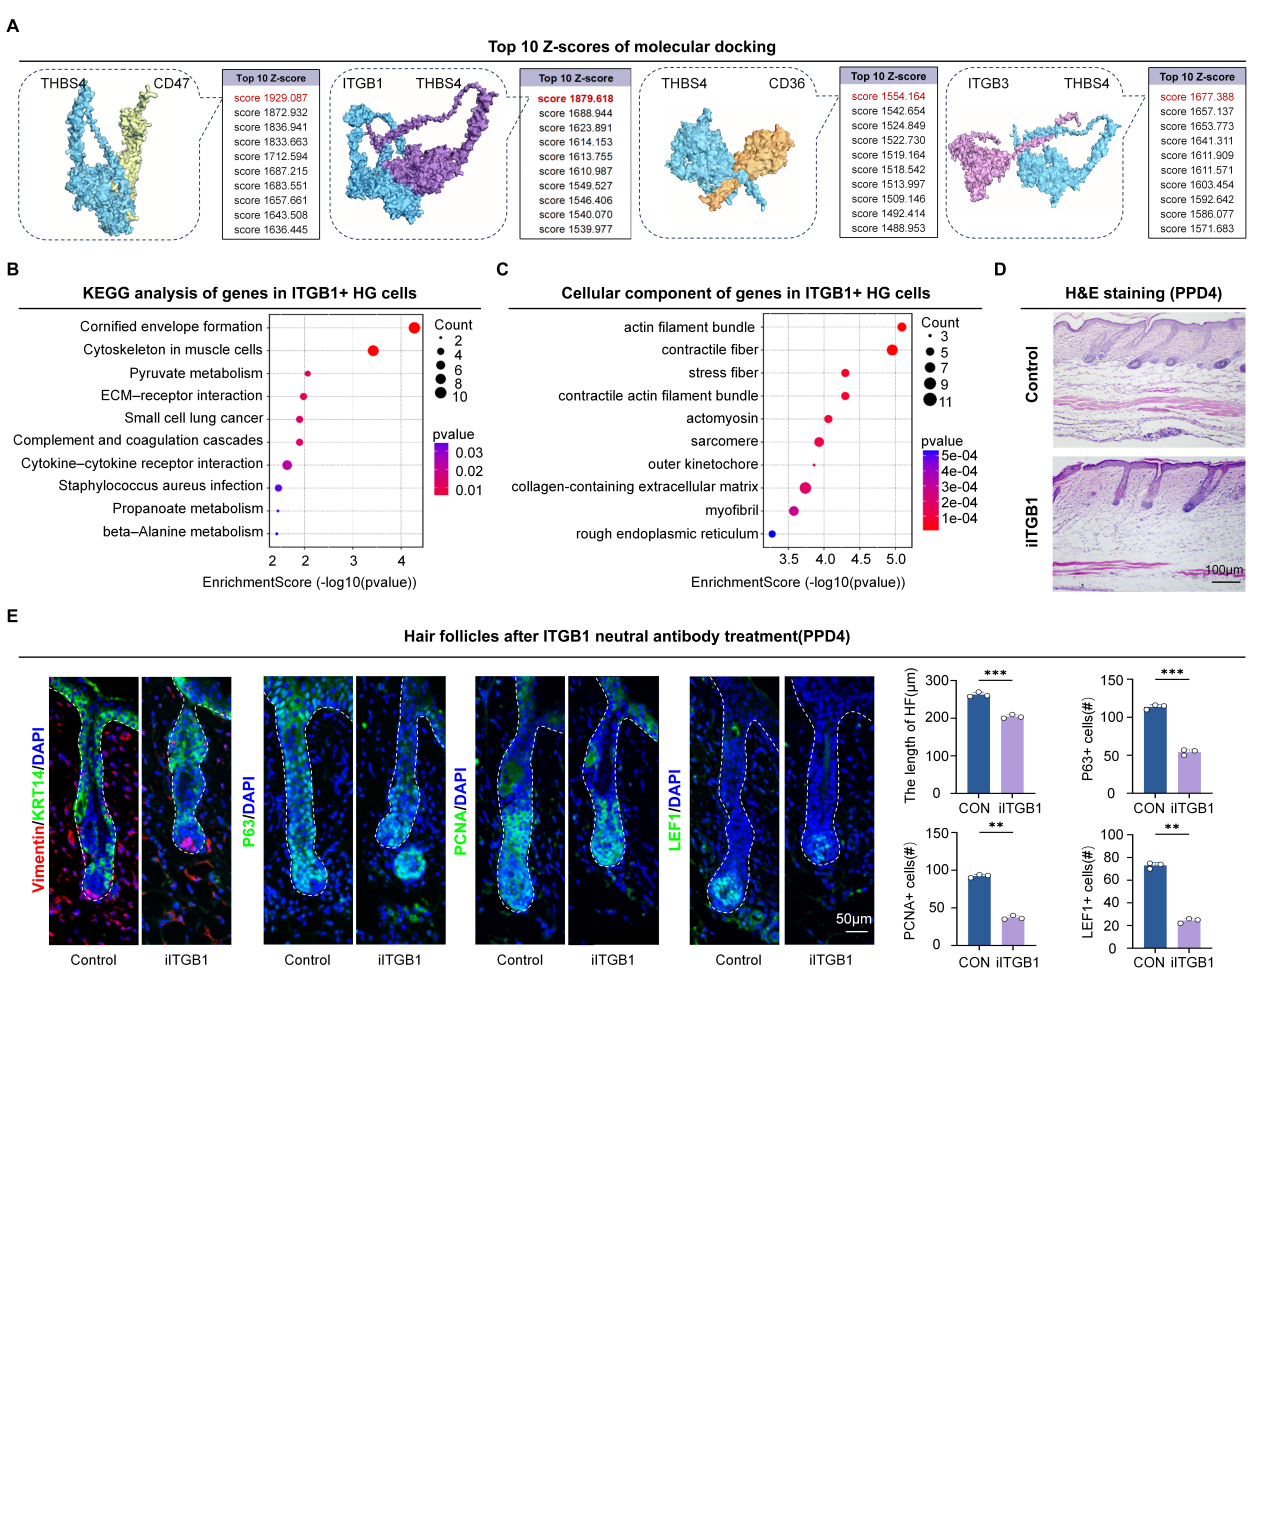


**Figure S4**

(A) Molecular docking top 10 z-scores for THBS4 binding to CD47, ITGB1, CD36, and ITGB3.

(B) Pathway analysis of ITGB1+ HG cell DEGs.

(C) GO cellular component analysis of ITGB1+ HG genes.

(D) H&E staining of hair follicles(PPD4).

(E) Immunofluorescence of PPD4 follicles (Vimentin/KRT14, P63, PCNA, LEF1) in control/anti-ITGB1 groups. Scale bar=50 μm.N=3, ***P<0.001, and **P<0.01.

**Supplementary figure 5**


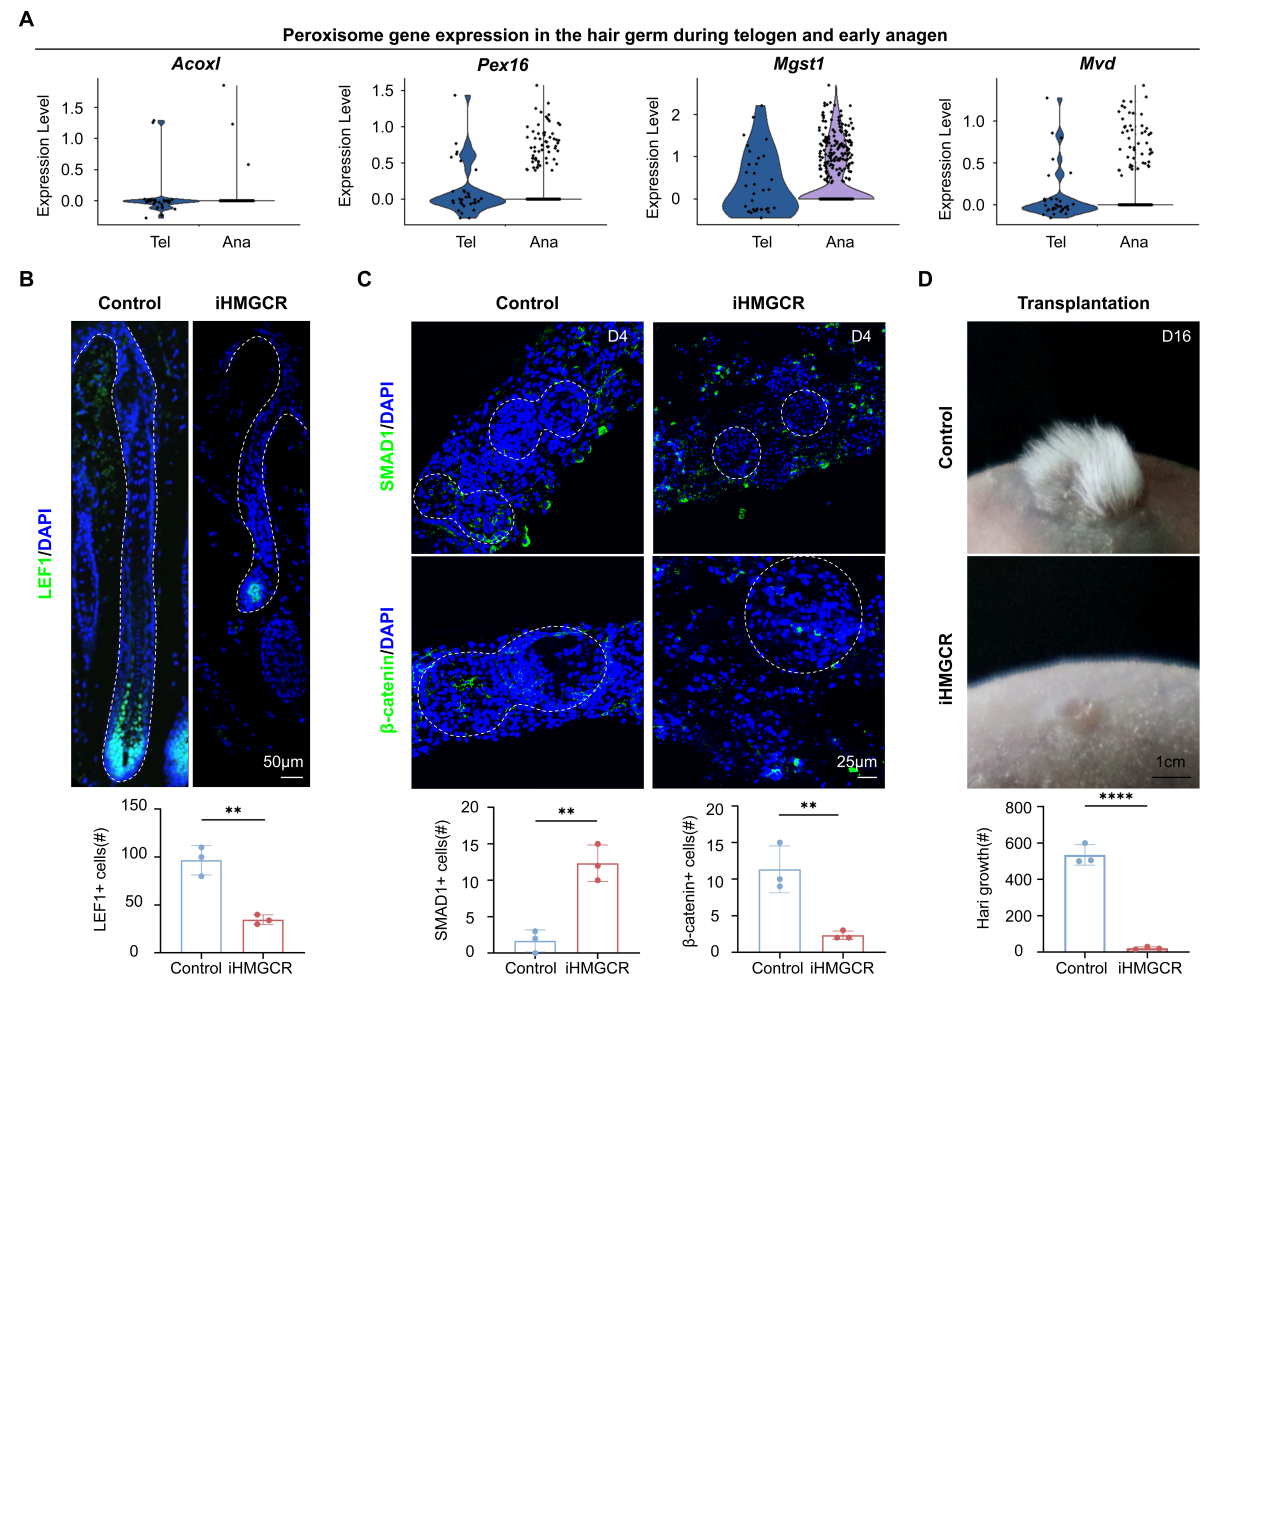


**Figure S5**

(A) Violin plots of peroxisome pathway genes in telogen/anagen HFSCs.

(B) LEF1 staining and quantification in control/iHMGCR follicles at PPD6. N=3, **P<0.01. Scale bar=20 μm.

(C) SMAD1/β-catenin staining and quantification in control/iHMGCR organoids. N=3, **P<0.01. Scale bar=25 μm.

(D) Tranplantation of organoids. N=3, **P<0.0001. Scale bar=1 cm.

**Supplementary figure 6**


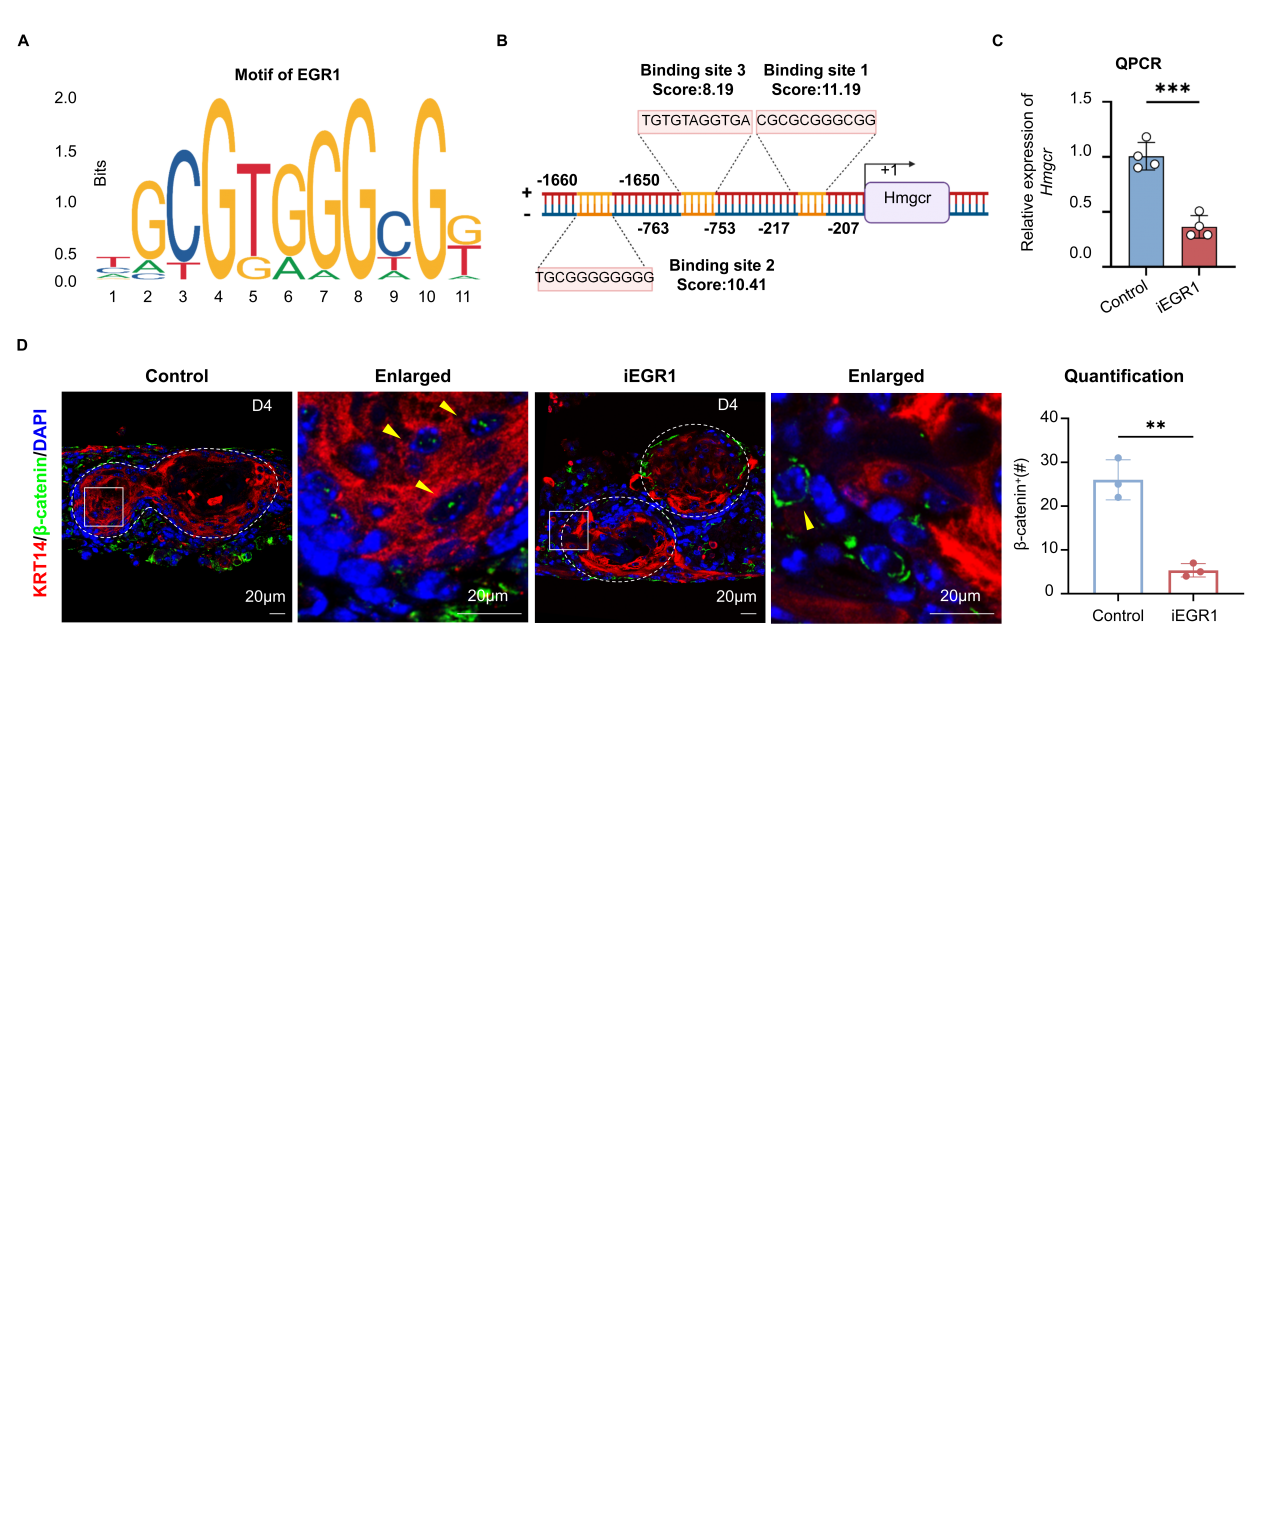


**Figure S6**

(A) EGR1 binding motif in Hmgcr promoter.

(B) Schematic of three high-score EGR1 binding sites in Hmgcr promoter.

(C) qPCR shows reduced HMGCR after Egr1 inhibition. N=3, ***P<0.001

(D) β-catenin/Vimentin/DAPI immunofluorescence in control/EGR1 inhibitor treated newborn mouse organoids at D4. N=3, **P<0.01. Scale bar=20 μm.

Supplementary Table 1. List of small molecule drugs in functional assays.

| **Name** | **Concentration** | **Company** | **Cat #** |
| --- | --- | --- | --- |
| THBS4 recombinant protein | In vivo: 1mg/mL 50μL  In vitro: 500ng/mL | UscnLife Science | URPD824Mu01 |
| ITGB1 neutralizing antibody | In vivo: 20μg/mL 50μL  In vitro: 5μg/mL | Sigma | MABT409 |
| HMGCR inhibitor | In vivo: 200μM 50μL  In vitro: 50μM | MCE | HY-17504B |
| EGR1 inhibitor | In vitro: 100μM | MCE | HY-163731 |

Supplementary Table 2. List of primer sequences for Real-time qPCR.

| **qRT-PCR Primers** | |  |
| --- | --- | --- |
| **Gene Name** | **Forward (5’ to 3’ )** | **Reverse (5’ to 3’ )** |
| Gapdh | CTGGGCTACACTGAGCACC | AAGTGGTCGTTGAGGGCAATG |
| Hmgcr | AGCTTGCCCGAATTGTATGTG | TCTGTTGTGAACCATGTGACTTC |
| Egr1 | TCGGCTCCTTTCCTCACTCA | CTCATAGGGTTGTTCGCTCGG |
| Hoxa9 | CCCCGACTTCAGTCCTTGC | GATGCACGTAGGGGTGGTG |
| Zic3 | TGCTGCCAGTTCAGGCTATG | GCAGAAGGGGTTTTAGTGGTATC |
| Hic1 | GGCCATTCGAGGCAGCTAC | AGGTTTAGCAGGTTGTCATGC |
| Myc | ATGCCCCTCAACGTGAACTTC | CGCAACATAGGATGGAGAGCA |
| Mycn | CCTCACTCCTAATCCGGTCAT | GTGCTGTAGTTTTTCGTTCACTG |

Supplementary Table 3. List of antibodies used in this study.

| **Antibody** | **Isotype** | **Company** | **Cat #** |
| --- | --- | --- | --- |
| THBS4 | Rabbit | Abcam | ab263898 |
| P63 | Rabbit | Genetex | GTX102425 |
| LEF1 | Rabbit | Zenbio | 380956 |
| Vimentin | Rabbit | Beyotime | AF1975 |
| Vimentin | Mouse | Beyotime | AF0318 |
| COL3A1 | Rabbit | Proteintech | 22734-1-AP |
| KRT14 | Rabbit | Beyotime | AF1987 |
| KRT14 | Mouse | Boster | A01432 |
| YAP1 | Mouse | Proteintech | 66900-1-Ig |
| ROCK2 | Rabbit | Boster | A01023-1 |
| ITGB1 | Rabbit | Proteintech | 12594-1-AP |
| BMP4 | Rabbit | Beyotime | AF6312 |
| β-catenin | Rabbit | Boster | A00004 |
| PCNA | Mouse | Servicebio | GB12010-100 |
| HMGCR | Rabbit | Beyotime | AF7119 |
| SMAD1 | Rabbit | Beyotime | AF1504 |
| EGR1 | Rabbit | Abcam | ab300449 |
| DCN | Rabbit | Beyotime | AF6693 |
| LY6A | Rabbit | Proteintech | 87403-1-RR |
| ACTA2 | Rabbit | Beyotime | AG0101 |
| CAMK1D | Rabbit | Abcam | ab172618 |
| SPP1 | Goat | R&D | AF808-SP |
